# Supplementary material
Source: PubMed Central journal article supplement (PMC521967)
Supplement: pnas_101_40_14414__3.pdf [file pnas_101_40_14414__3.pdf]

**Table 2. Rate coefficients**

| <b>Carbon monoxide</b>              |                       | Henry <i>et al.</i> (1)*             | Simulations <sup>†</sup>   |
|-------------------------------------|-----------------------|--------------------------------------|----------------------------|
| $k_{gem}(t)$                        | $s^{-1}$              | $8 \times 10^3$                      | $3.3 \times 10^4$          |
| $k_{gem}(r)$                        | $s^{-1}$              | $6 \times 10^6$                      | $5 \times 10^6$            |
| $k_{diss}(t)$                       | $s^{-1}$              | 0.07                                 | 0.2                        |
| $k_{diss}(r)$                       | $s^{-1}$              | 0.02                                 | 0.022                      |
| $k(t,r)_{out}$                      | $s^{-1}$              | $7 \times 10^6$                      | $6 \times 10^6$            |
| $k(t,r)_{in}$                       | $M^{-1} \cdot s^{-1}$ | $7 \times 10^6$                      | $2.2 \times 10^7$          |
| $k_T(r \rightarrow t)$ <sup>§</sup> | $s^{-1}$              | $1 \times 10^8 / \sigma$             | $1 \times 10^8 / \sigma$   |
| $k_T(t \rightarrow r)$              | $s^{-1}$              | $3 \times 10^5 / \sigma$             | $1.5 \times 10^5 / \sigma$ |
| $k_T(rx \rightarrow tx)$            | $s^{-1}$              | $90 / \sigma$                        | $200 / \sigma$             |
| $k_T(tx \rightarrow rx)$            | $s^{-1}$              | $900 / \sigma$                       | $400 / \sigma$             |
| <b>Carbon monoxide</b>              |                       | Unzai <i>et al.</i> (2) <sup>‡</sup> |                            |
| $k_{on}(t)$                         | $M^{-1} \cdot s^{-1}$ | $8 \times 10^4$                      | $1.2 \times 10^5$          |
| $k_{off}(t)$                        | $s^{-1}$              | 0.2                                  | 0.2                        |
| $k_{on}(r)$                         | $M^{-1} \cdot s^{-1}$ | $1 \times 10^7$                      | $1 \times 10^7$            |
| $k_{off}(r)$                        | $s^{-1}$              | 0.01                                 | 0.012                      |
| <b>Oxygen</b>                       |                       |                                      |                            |
| $k_{on}(t)$                         | $M^{-1} \cdot s^{-1}$ | $8 \times 10^6$                      | $6.8 \times 10^6$          |
| $k_{off}(t)$                        | $s^{-1}$              | $3 \times 10^3$                      | $1.1 \times 10^3$          |
| $k_{on}(r)$                         | $M^{-1} \cdot s^{-1}$ | $1 \times 10^8$                      | $1 \times 10^8$            |
| $k_{off}(r)$                        | $s^{-1}$              | 20                                   | 12                         |

\*0.1 M potassium phosphate, pH 7, 20°C.

<sup>†</sup>Gel conditions, 15°C (see *Methods*).

<sup>‡</sup>pH 7.4, 25°C (plus 0.1 mM IHP for the quaternary *T*-state, which corresponds to the *t* state of the TTS model). The overall binding and dissociation rate coefficients [ $k_{on}(t,r)$  and  $k_{off}(t,r)$ ] are related to the rate coefficients of the TTS model by:

$$k_{on}(t,r) = k_{in} \frac{k_{gem}(t,r)}{k_{gem}(t,r) + k_{out}} \quad \text{and} \quad k_{off}(t,r) = k_{out} \frac{k_{diss}(t,r)}{k_{gem}(t,r) + k_{out}}.$$

<sup>§</sup> $\sigma$  is the slowing factor due to the constraints of encapsulation by the gel.

1. Henry, E. R., Bettati, S., Hofrichter, J. & Eaton, W. A. (2002) *Biophys. Chem.* **98**, 149-164.
2. Unzai, S., Eich, R., Shibayama, N., Olson, J. S. & Morimoto, H. (1998) *J. Biol. Chem.* **273**, 23150-23159.
